# Supplementary material for: Magnetism, dielectrics and ion conduction in two polymorphs of a heteroleptic bis(dithiolato)nickelate molecular solid
Source: Royal Society of Chemistry journal article supplement (doi:10.1039/d1nj00491c), 2021-01-01
Supplement: d1nj00491c1.pdf [file d1nj00491c1.pdf]

## Supporting Information

### **Magnetism, dielectrics and ion conduction in two polymorphs of a heteroleptic bis(dithiolato)nickelate molecular solid**

Xuan-Rong Chen,\*<sup>a</sup> Min-Luo,<sup>a</sup> Zhen-Min Zhang,<sup>a</sup> Xiao-Yi Xu,<sup>b</sup> Yi Jiang,<sup>a</sup> Hang Liu<sup>a</sup>

<sup>a</sup> School of Chemistry & Environmental Engineering and Instrumental Analysis Center, Yancheng Teachers University, Yancheng 224007, P. R. China

<sup>b</sup> State Key Laboratory of Materials-Oriented Chemical Engineering and College of Chemistry & Molecular Engineering, Nanjing Tech University, Nanjing 211816, P. R. China

Tel.: +86 515 88231709

Fax: +86 515 88231709

Email: [chenxr@yctu.edu.cn](mailto:chenxr@yctu.edu.cn) (XRC)

Table S1: Bond lengths and bond angles in both anions and cations of **1 $\alpha$**  and **1 $\beta$**  at 293 K.

| <b>1<math>\alpha</math></b> |            |                 |            |
|-----------------------------|------------|-----------------|------------|
| Ni(1)-S(4)                  | 2.1615(8)  | Ni(1)-S(5)      | 2.1661(8)  |
| Ni(1)-S(6)                  | 2.1512(8)  | Ni(1)-S(7)      | 2.1321(8)  |
| S(1)-C(3)                   | 1.731(3)   | S(1)-C(2)       | 1.738(3)   |
| S(2)-C(3)                   | 1.728(3)   | S(2)-C(1)       | 1.736(3)   |
| S(3)-C(3)                   | 1.639(3)   | S(4)-C(2)       | 1.709(3)   |
| S(5)-C(1)                   | 1.697(3)   | S(6)-C(4)       | 1.727(3)   |
| S(7)-C(5)                   | 1.722(3)   | N(1)-C(7)       | 1.131(4)   |
| N(2)-C(6)                   | 1.125(4)   | N(3)-C(10)      | 1.499(3)   |
| N(3)-C(15)                  | 1.506(3)   | N(3)-C(8)       | 1.519(3)   |
| N(3)-C(13)                  | 1.522(4)   | C(1)-C(2)       | 1.364(4)   |
| C(4)-C(5)                   | 1.351(4)   | C(4)-C(7)       | 1.443(4)   |
| C(5)-C(6)                   | 1.430(4)   | C(8)-C(9)       | 1.496(4)   |
| C(10)-C(11)                 | 1.484(4)   | C(11)-C(12)     | 1.484(5)   |
| C(13)-C(14)                 | 1.503(4)   | C(15)-C(16)     | 1.513(4)   |
| S(7)-Ni(1)-S(6)             | 92.47(3)   | S(7)-Ni(1)-S(4) | 178.79(3)  |
| S(6)-Ni(1)-S(4)             | 88.70(3)   | S(7)-Ni(1)-S(5) | 85.96(3)   |
| S(6)-Ni(1)-S(5)             | 177.78(3)  | S(4)-Ni(1)-S(5) | 92.87(3)   |
| <b>1<math>\beta</math></b>  |            |                 |            |
| Ni(1)-S(2)                  | 2.1446(15) | Ni(1)-S(1)      | 2.1537(16) |
| Ni(1)-S(4)                  | 2.1542(16) | Ni(1)-S(3)      | 2.1654(15) |
| S(1)-C(2)                   | 1.737(6)   | S(2)-C(3)       | 1.708(7)   |
| S(3)-C(5)                   | 1.715(5)   | S(4)-C(6)       | 1.708(5)   |
| S(5)-C(5)                   | 1.730(5)   | S(5)-C(7)       | 1.757(6)   |
| S(6)-C(7)                   | 1.725(6)   | S(6)-C(6)       | 1.726(5)   |
| S(7)-C(7)                   | 1.609(7)   | N(1)-C(1)       | 1.155(9)   |
| N(2)-C(4)                   | 1.114(8)   | C(1)-C(2)       | 1.399(9)   |
| C(2)-C(3)                   | 1.369(10)  | C(3)-C(4)       | 1.446(8)   |
| C(5)-C(6)                   | 1.362(8)   | N(3)-C(15)      | 1.503(5)   |
| N(3)-C(11)                  | 1.511(5)   | N(3)-C(8)       | 1.515(5)   |
| N(3)-C(13)                  | 1.516(5)   | C(8)-C(9)       | 1.508(7)   |
| C(9)-C(10)                  | 1.489(7)   | C(11)-C(12)     | 1.512(7)   |
| C(13)-C(14)                 | 1.508(7)   | C(15)-C(16)     | 1.493(7)   |
| S(2)-Ni(1)-S(1)             | 92.51(7)   | S(2)-Ni(1)-S(4) | 86.56(5)   |
| S(1)-Ni(1)-S(4)             | 179.06(7)  | S(2)-Ni(1)-S(3) | 179.34(7)  |
| S(1)-Ni(1)-S(3)             | 88.14(4)   | S(4)-Ni(1)-S(3) | 92.78(7)   |

Table S2: Bond lengths (Å) in both anions and cations of **1 $\alpha$**  and **1 $\beta$**  after crystal structure optimization.

| <b>1<math>\alpha</math></b> |       |             |       |
|-----------------------------|-------|-------------|-------|
| Ni(1)-S(4)                  | 2.229 | Ni(1)-S(5)  | 2.250 |
| Ni(1)-S(6)                  | 2.199 | Ni(1)-S(7)  | 2.192 |
| S(1)-C(3)                   | 1.743 | S(1)-C(2)   | 1.743 |
| S(2)-C(3)                   | 1.745 | S(2)-C(1)   | 1.734 |
| S(3)-C(3)                   | 1.651 | S(4)-C(2)   | 1.706 |
| S(5)-C(1)                   | 1.705 | S(6)-C(4)   | 1.727 |
| S(7)-C(5)                   | 1.717 | N(1)-C(7)   | 1.172 |
| N(2)-C(6)                   | 1.171 | N(3)-C(10)  | 1.524 |
| N(3)-C(15)                  | 1.522 | N(3)-C(8)   | 1.525 |
| N(3)-C(13)                  | 1.526 | C(1)-C(2)   | 1.395 |
| C(4)-C(5)                   | 1.394 | C(4)-C(7)   | 1.411 |
| C(5)-C(6)                   | 1.411 | C(8)-C(9)   | 1.516 |
| C(10)-C(11)                 | 1.520 | C(11)-C(12) | 1.524 |
| C(13)-C(14)                 | 1.517 | C(15)-C(16) | 1.518 |
| <b>1<math>\beta</math></b>  |       |             |       |
| Ni(1)-S(2)                  | 2.210 | Ni(1)-S(1)  | 2.224 |
| Ni(1)-S(4)                  | 2.294 | Ni(1)-S(3)  | 2.257 |
| S(1)-C(2)                   | 1.719 | S(2)-C(3)   | 1.719 |
| S(3)-C(5)                   | 1.720 | S(4)-C(6)   | 1.720 |
| S(5)-C(5)                   | 1.748 | S(5)-C(7)   | 1.745 |
| S(6)-C(7)                   | 1.735 | S(6)-C(6)   | 1.738 |
| S(7)-C(7)                   | 1.654 | N(1)-C(1)   | 1.172 |
| N(2)-C(4)                   | 1.171 | C(1)-C(2)   | 1.414 |
| C(2)-C(3)                   | 1.394 | C(3)-C(4)   | 1.411 |
| C(5)-C(6)                   | 1.386 | N(3)-C(15)  | 1.523 |
| N(3)-C(11)                  | 1.524 | N(3)-C(8)   | 1.529 |
| N(3)-C(13)                  | 1.529 | C(8)-C(9)   | 1.522 |
| C(9)-C(10)                  | 1.527 | C(11)-C(12) | 1.513 |
| C(13)-C(14)                 | 1.515 | C(15)-C(16) | 1.515 |

Table S3: Typical interatomic and plane-to-plane distances (Å) in an anion stack in **1 $\alpha$**  and **1 $\beta$** .

|                                        | <b>1<math>\alpha</math></b> |                          | <b>1<math>\beta</math></b> |
|----------------------------------------|-----------------------------|--------------------------|----------------------------|
| $d_{\text{Ni1...Ni1}}$                 | 3.948                       | $d_{\text{Ni1...Ni1}}$   | 4.200                      |
| $d_{\text{plane-plane}}$               | 3.569                       | $d_{\text{plane-plane}}$ | 3.557                      |
| $d_{\text{S2...S2}}$                   | 3.391                       | $d_{\text{N2...H13B}}$   | 2.5728(76)                 |
| $d_{\text{S2\#1...S2\#2}}$             | 3.3910 (12)                 | $d_{\text{N2...H15B}}$   | 2.6208(71)                 |
| $d_{\text{S7...H13B}}$                 | 2.9854(8)                   | $d_{\text{S3...H14A}}$   | 2.9829(14)                 |
| $d_{\text{N1...H10A}}$                 | 2.6410(34)                  | $d_{\text{S6...H12B}}$   | 2.9337(16)                 |
| $d_{\text{N2...H8B}}$                  | 2.4048(40)                  |                          |                            |
| #1 = 2-x, -y, 1-z; #2 = 1+x, -1+y, 1+z |                             |                          |                            |

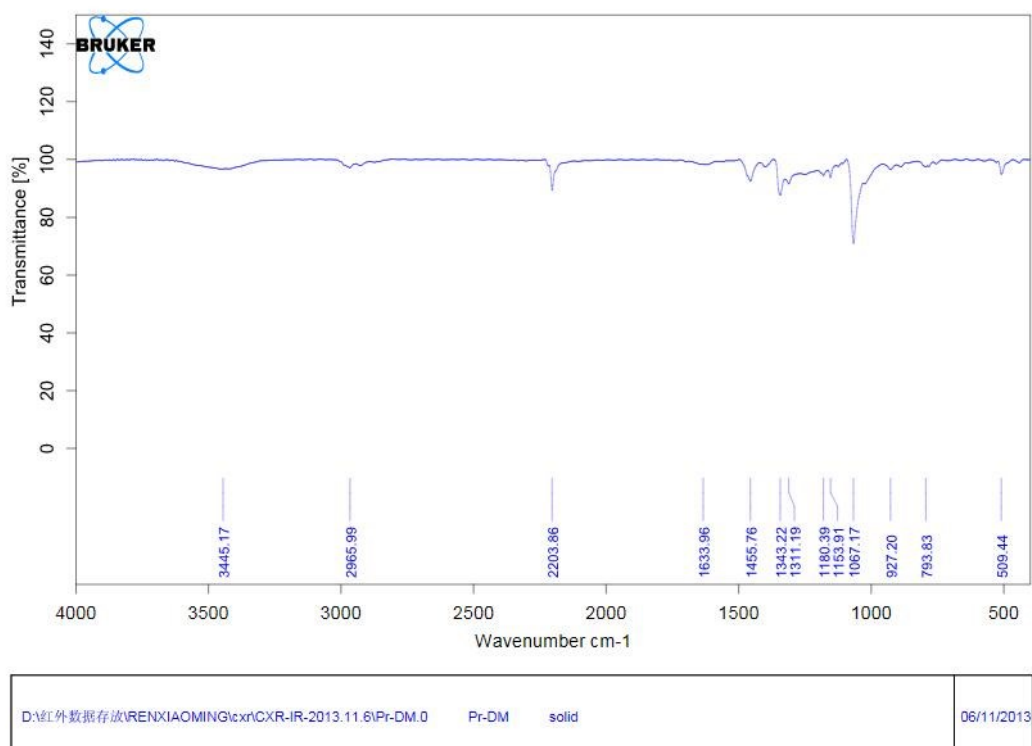

Page 1/1

Fig.S1 FT-IR spectrum of **1 $\alpha$** .

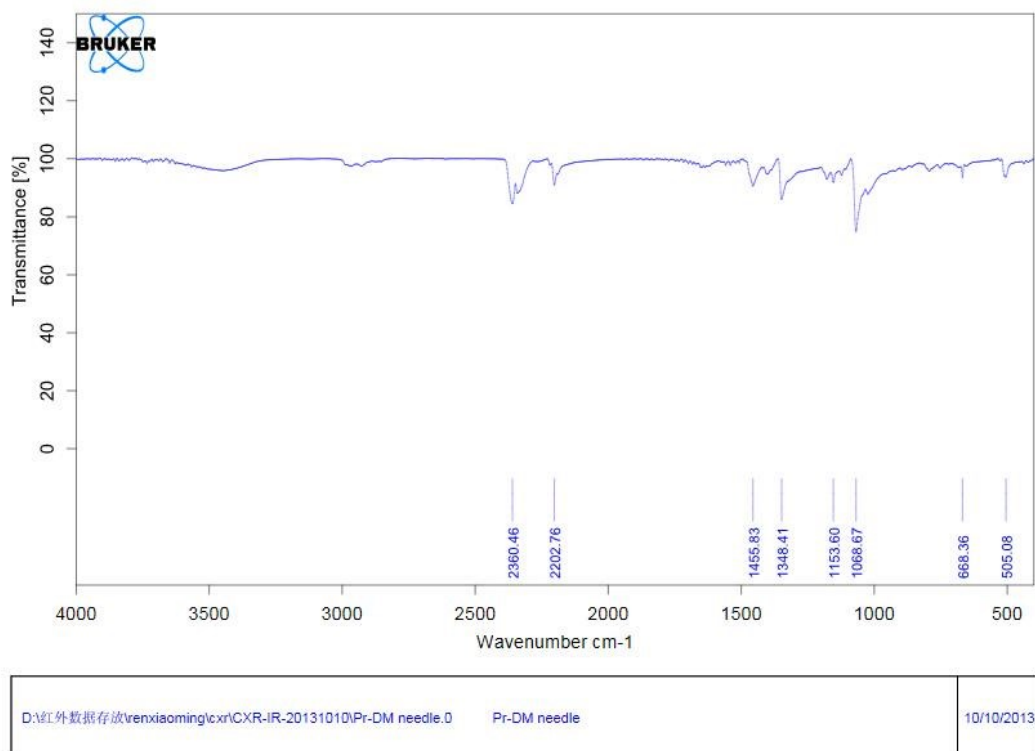

Page 1/1

Fig.S2 FT-IR spectrum of **1β**.

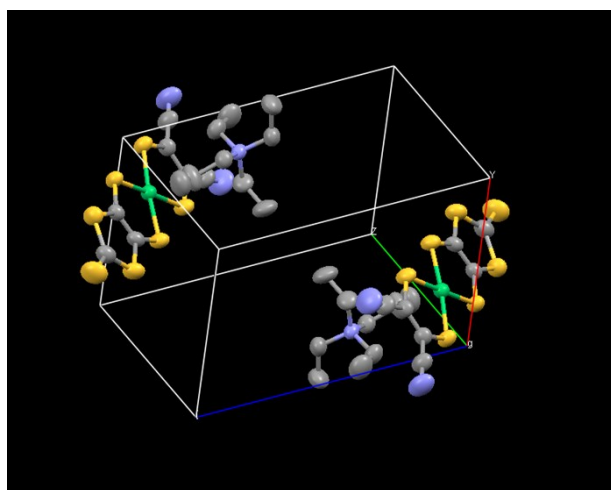

Fig.S3 The optimized crystal structure of **1α** through CASTEP.

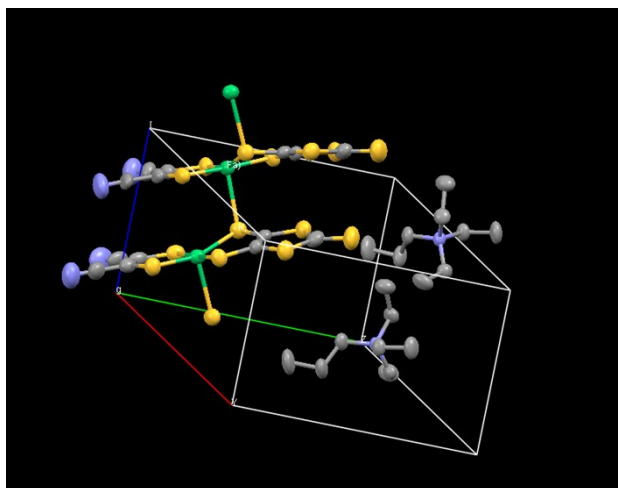

Fig.S4 The optimized crystal structure of **1β** through CASTEP.

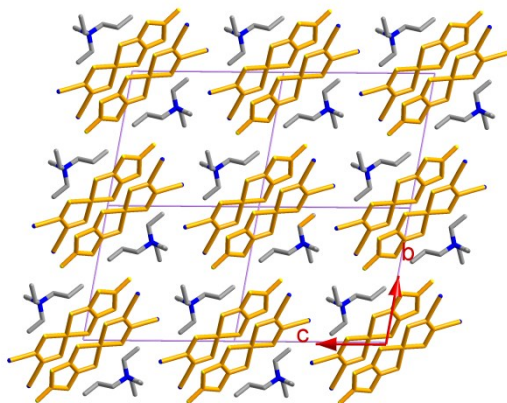

Fig.S5 The alternating layers of  $\text{Et}_3\text{PrN}^+$  cations and  $[\text{Ni}(\text{dmit})(\text{mnt})]^-$  anions of **1α** viewed in the a-axis direction.
